# Supplementary material for: Dual-Drug Delivery via the Self-Assembled Conjugates of Choline-Functionalized Graft Copolymers
Source: MDPI journal article supplement (doi:10.3390/ma15134457), 2022-06-24
Supplement: s1 [file s1]

# Supporting Information

## Dual drug delivery via self-assembled conjugates of choline functionalized graft copolymers

Katarzyna Niesyto, Aleksy Mazur and Dorota Neugebauer \*

\* Department of Physical Chemistry and Technology of Polymers, Faculty of Chemistry, Silesian University of Technology, 44-100 Gliwice, Poland

\* Correspondence: Dorota.Neugebauer@polsl.pl

### Contents:

**Figure S1.** Representative  $^1\text{H}$  NMR spectrum of graft copolymer I.

**Figure S2.** Representative plot of interfacial tension vs logarithm of the conjugate concentration  $\Pi_{\text{FUS}}$  in aqueous solution at 25 °C.

**Table S1.** Hydrodynamic diameters ( $D_h$ ) of nanoparticles determined using DLS.

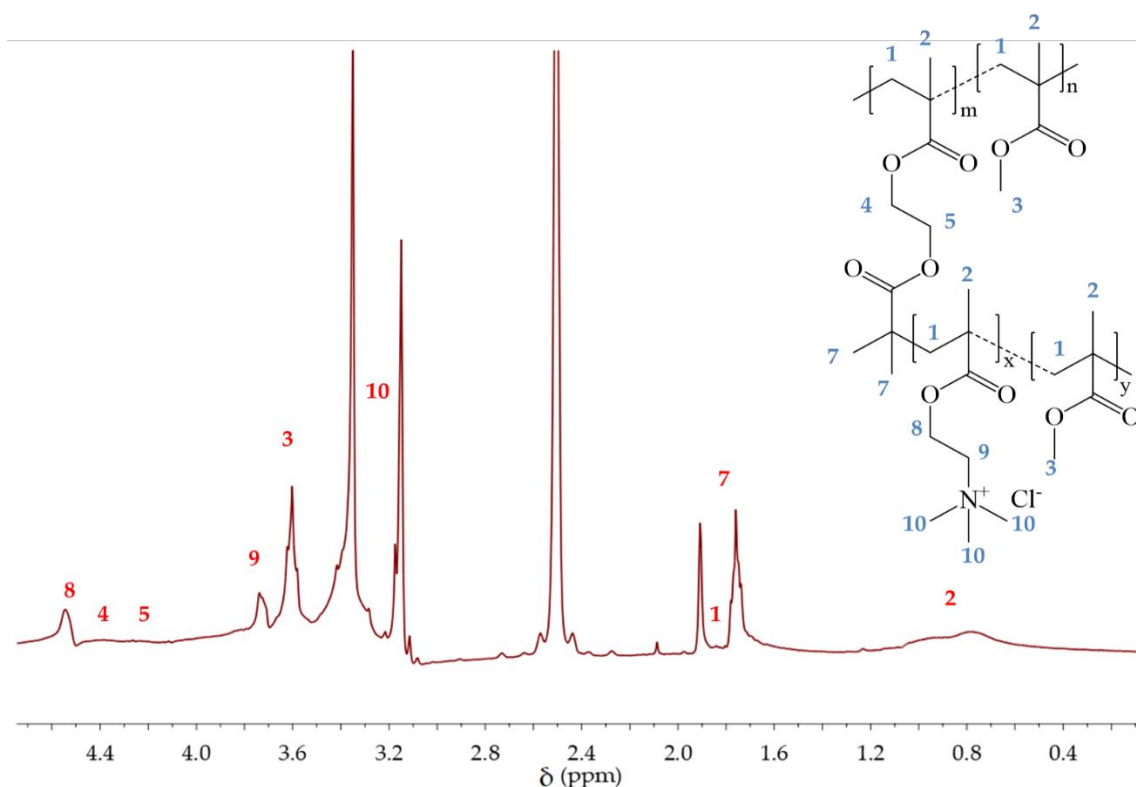

**Figure S1.** Representative  $^1\text{H}$  NMR spectrum of graft copolymer I.

$^1\text{H}$  NMR (DMSO- $d_6$ ,  $\delta$ , ppm): 4.63-4.43 (2H,  $-\text{CH}_2\text{-O-}$ ), 4.47-4.28 (2H,  $-\text{CH}_2\text{-OOC-C-}(\text{CH}_3)_2\text{Br}$ ), 4.28-4.08 (2H,  $-\text{COO-CH}_2$ ), 3.86-3.65 (2H,  $-\text{CH}_2\text{-N}^+$ ), 3.65-3.47 (3H,  $-\text{O-CH}_3$ ), 3.42-3.01 (9H,  $-\text{N}^+(\text{CH}_3)_3$ ), 1.98-1.82 (6H,  $-(\text{CH}_3)_2\text{Br}$  initiating moiety), 1.4-0.51 (3H,  $-\text{CH}_3$  backbone).

After exchange of  $\text{Cl}^-$  by  $\text{FUS}^-$ , the new signals appeared in  $^1\text{H}$  NMR (DMSO- $d_6$ ,  $\delta$ , ppm): 0.7-0.9 (3x3H,  $-\text{CH}_3$  at ring, #14,15,21), 0.9-1.2 (3x2H and 3x1H,  $-\text{CH}_2$  in ring, #1(1H),2(2H),6(2H),7(2H),10(1H),12(1H)), 1.25 (3H,  $-\text{CH}_3$  at ring, #22), 1.3-1.4 (2x1H,  $\text{CH}$  in ring,  $\text{CH-CH}_3$ , #8,4), 1.6-1.7 (2x3H,  $-\text{CH}_3$ , #19,20), 1.8 (3H,  $-\text{OCOCH}_3$  #24), 2.02-2.17 (2x2H,  $-\text{CH}_2$ , #16,17), 2.17-2.33 (3x1H,  $-\text{CH}_2$  in ring, #1(1H),10(1H),12(1H)), 4.0-4.2 (2x1H,  $\text{CH-OH}$ , #3,9), 5.10 (1H,  $-\text{CH=}$  #18), 5.88 (1H,  $-\text{CH-COOCH}_3$  #13).

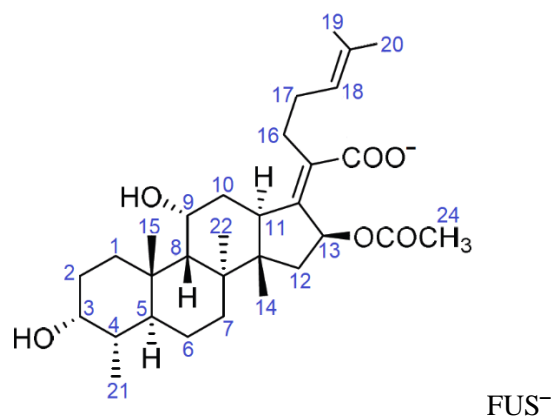

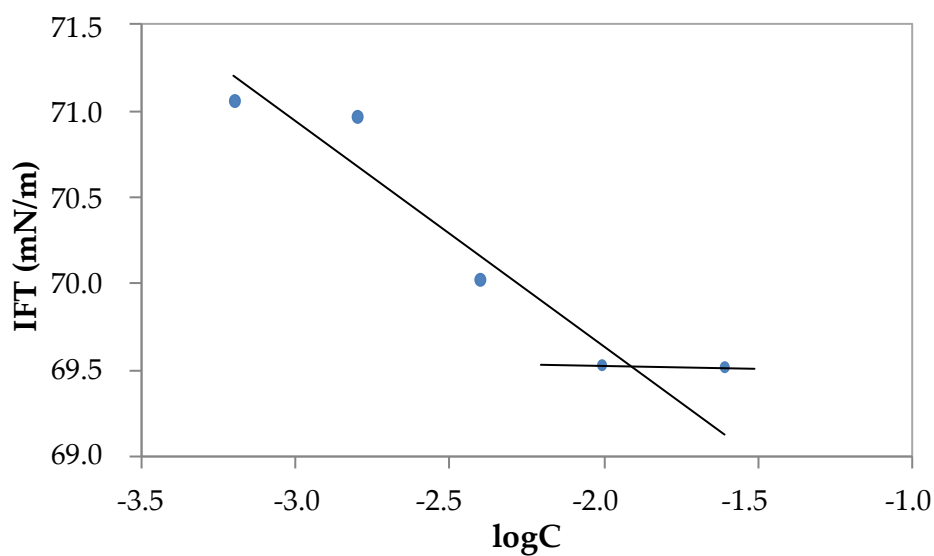

**Figure S2.** Representative plot of interfacial tension vs logarithm of the conjugate concentration II\_FUS in aqueous solution at 25 °C.

**Table S1.** Hydrodynamic diameters ( $D_h$ ) of nanoparticles determined using DLS<sup>a</sup>.

|     | CF (37) |           |               | FUS <sup>-</sup> |           |               | RIF   |           |               | FUS <sup>-</sup> /RIF |           |               |
|-----|---------|-----------|---------------|------------------|-----------|---------------|-------|-----------|---------------|-----------------------|-----------|---------------|
|     | PDI     | Size (nm) | Intensity (%) | PDI              | Size (nm) | Intensity (%) | PDI   | Size (nm) | Intensity (%) | PDI                   | Size (nm) | Intensity (%) |
| I   | 0.454   | 18<br>125 | 64<br>32      | 0.424            | 26<br>199 | 58<br>41      | 0.436 | 97<br>14  | 94<br>5       | 0.23                  | 31<br>184 | 52<br>40      |
| II  | 0.241   | 72        | 100           | 0.564            | 208<br>29 | 83<br>7       | 0.377 | 40<br>216 | 55<br>40      | 0.371                 | 51<br>531 | 90<br>6       |
| III | 0.293   | 105       | 99            | 0.281            | 95        | 100           | 0.269 | 94        | 96            | 0.27                  | 65        | 95            |

<sup>a</sup>concentration of copolymer in water: 1 or 0.5 mg/mL.
